# Supplementary material for: Relation between differential solubility of cellulose and lignin in ionic liquids and activity coefficients
Source: Royal Society of Chemistry journal article supplement (doi:10.1039/c2ra22800a), 2013-01-01
Supplement: c2ra22800a.pdf [file c2ra22800a.pdf]

**Table S1** Activity coefficients of M4 cellulose model in ionic liquids calculated by COSMO-RS at 90 °C

|          | F    | Ac   | Fm   | C6H5CO2 | Cl   | C2H6PO4 | C4H10SO4 | C8H18PO4 | E2PO4 | MeSO3 | Br   | tol-SO3 | EtSO4 | MeSO4 | SCN  | HSO4 | BF4  | CCN3 | CF3SO3 | PF6  | BC4N4 | FeCl4 | Tf2N | PB6  |      |      |      |      |      |      |      |      |
|----------|------|------|------|---------|------|---------|----------|----------|-------|-------|------|---------|-------|-------|------|------|------|------|--------|------|-------|-------|------|------|------|------|------|------|------|------|------|------|
| bbbbN    | 0.12 | 0.30 | 0.34 | 0.38    | 0.39 | 0.42    | 0.41     | 0.41     | 0.42  | 0.49  | 0.51 | 0.56    | 0.57  | 0.57  | 0.57 | 0.59 | 0.62 | 0.63 | 0.63   | 0.64 | 0.66  | 0.72  | 0.72 | 0.75 | 0.75 | 0.82 | 0.83 | 0.89 | 0.91 | 1.03 |      |      |
| bbbbP    | 0.13 | 0.31 | 0.35 | 0.40    | 0.41 | 0.43    | 0.43     | 0.42     | 0.43  | 0.50  | 0.53 | 0.57    | 0.58  | 0.58  | 0.58 | 0.60 | 0.63 | 0.64 | 0.64   | 0.64 | 0.65  | 0.67  | 0.73 | 0.73 | 0.75 | 0.76 | 0.82 | 0.84 | 0.89 | 0.91 | 1.02 |      |
| bbboP    | 0.13 | 0.31 | 0.35 | 0.39    | 0.40 | 0.43    | 0.42     | 0.42     | 0.43  | 0.50  | 0.52 | 0.56    | 0.58  | 0.58  | 0.58 | 0.59 | 0.62 | 0.63 | 0.64   | 0.63 | 0.64  | 0.66  | 0.71 | 0.72 | 0.75 | 0.75 | 0.82 | 0.83 | 0.90 | 0.91 | 1.02 |      |
| becep    | 0.13 | 0.37 | 0.42 | 0.47    | 0.46 | 0.43    | 0.48     | 0.47     | 0.49  | 0.59  | 0.62 | 0.65    | 0.68  | 0.68  | 0.68 | 0.73 | 0.79 | 0.72 | 0.68   | 0.74 | 0.77  | 0.84  | 0.93 | 0.88 | 0.92 | 0.86 | 0.94 | 0.99 | 0.93 | 0.94 | 1.10 |      |
| Cl4rHxP  | 0.14 | 0.33 | 0.36 | 0.41    | 0.42 | 0.42    | 0.44     | 0.45     | 0.45  | 0.51  | 0.53 | 0.58    | 0.60  | 0.60  | 0.60 | 0.60 | 0.64 | 0.65 | 0.67   | 0.65 | 0.65  | 0.67  | 0.70 | 0.74 | 0.77 | 0.77 | 0.85 | 0.84 | 0.94 | 0.95 | 1.05 |      |
| MpPyr    | 0.14 | 0.39 | 0.44 | 0.49    | 0.50 | 0.53    | 0.51     | 0.48     | 0.52  | 0.63  | 0.66 | 0.68    | 0.70  | 0.70  | 0.70 | 1.16 | 0.82 | 0.75 | 0.70   | 0.78 | 0.81  | 0.87  | 0.98 | 0.92 | 0.92 | 0.89 | 0.97 | 0.98 | 0.93 | 0.94 | 1.07 |      |
| BmPyr    | 0.15 | 0.38 | 0.43 | 0.47    | 0.49 | 0.51    | 0.49     | 0.47     | 0.50  | 0.61  | 0.64 | 0.66    | 0.68  | 0.68  | 0.68 | 0.74 | 0.78 | 0.73 | 0.69   | 0.75 | 0.78  | 0.83  | 0.93 | 0.88 | 0.88 | 0.86 | 0.93 | 0.94 | 0.91 | 0.93 | 1.05 |      |
| Bmmim    | 0.17 | 0.42 | 0.47 | 0.51    | 0.53 | 0.54    | 0.52     | 0.50     | 0.53  | 0.64  | 0.69 | 0.69    | 0.70  | 0.70  | 0.70 | 0.77 | 0.86 | 0.75 | 0.70   | 0.77 | 0.80  | 0.89  | 0.96 | 0.87 | 0.98 | 0.86 | 0.90 | 1.06 | 0.90 | 0.92 | 1.11 |      |
| 1e2mPy   | 0.19 | 0.48 | 0.54 | 0.58    | 0.59 | 0.61    | 0.58     | 0.54     | 0.59  | 0.73  | 0.80 | 0.77    | 0.78  | 0.78  | 0.78 | 0.89 | 1.04 | 0.83 | 0.75   | 0.87 | 0.91  | 1.06  | 1.12 | 0.99 | 1.17 | 0.95 | 0.99 | 1.26 | 0.95 | 0.96 | 1.22 |      |
| 1b4mPy   | 0.21 | 0.47 | 0.52 | 0.56    | 0.58 | 0.59    | 0.56     | 0.53     | 0.57  | 0.68  | 0.75 | 0.72    | 0.73  | 0.73  | 0.73 | 0.82 | 0.91 | 0.78 | 0.73   | 0.81 | 0.84  | 0.93  | 0.99 | 0.89 | 1.02 | 0.88 | 0.90 | 1.10 | 0.89 | 0.92 | 1.11 |      |
| EtOEmim  | 0.22 | 0.49 | 0.55 | 0.58    | 0.61 | 0.61    | 0.58     | 0.55     | 0.60  | 0.72  | 0.80 | 0.75    | 0.76  | 0.76  | 0.76 | 0.86 | 0.97 | 0.81 | 0.75   | 0.84 | 0.88  | 0.99  | 1.05 | 0.94 | 1.07 | 0.91 | 0.94 | 1.14 | 0.91 | 0.93 | 1.13 |      |
| 1Hx4mPy  | 0.22 | 0.45 | 0.50 | 0.54    | 0.57 | 0.57    | 0.54     | 0.52     | 0.56  | 0.65  | 0.72 | 0.69    | 0.70  | 0.70  | 0.70 | 0.77 | 0.86 | 0.75 | 0.71   | 0.77 | 0.79  | 0.87  | 0.93 | 0.83 | 0.96 | 0.84 | 0.85 | 1.03 | 0.87 | 0.87 | 0.90 | 1.07 |
| Pmmim    | 0.25 | 0.56 | 0.63 | 0.65    | 0.69 | 0.68    | 0.64     | 0.59     | 0.65  | 0.80  | 0.89 | 0.81    | 0.83  | 0.83  | 0.83 | 0.72 | 1.06 | 0.86 | 0.78   | 0.92 | 0.96  | 1.09  | 1.17 | 1.01 | 1.14 | 0.97 | 0.97 | 1.18 | 0.90 | 0.93 | 1.11 |      |
| Hxnmim   | 0.25 | 0.51 | 0.57 | 0.59    | 0.64 | 0.62    | 0.60     | 0.57     | 0.61  | 0.72  | 0.81 | 0.74    | 0.75  | 0.75  | 0.75 | 0.77 | 0.92 | 0.79 | 0.74   | 0.82 | 0.85  | 0.94  | 1.00 | 0.88 | 0.99 | 0.87 | 0.86 | 1.04 | 0.84 | 0.89 | 1.03 |      |
| Emim     | 0.26 | 0.59 | 0.67 | 0.69    | 0.73 | 0.72    | 0.67     | 0.62     | 0.69  | 0.85  | 0.95 | 0.86    | 0.88  | 0.88  | 0.88 | 1.04 | 1.15 | 0.91 | 0.81   | 0.97 | 1.03  | 1.18  | 1.27 | 1.09 | 1.22 | 1.02 | 1.03 | 1.26 | 0.92 | 0.96 | 1.15 |      |
| Denmim   | 0.26 | 0.48 | 0.53 | 0.56    | 0.60 | 0.59    | 0.57     | 0.55     | 0.58  | 0.67  | 0.74 | 0.70    | 0.70  | 0.70  | 0.70 | 0.76 | 0.82 | 0.75 | 0.72   | 0.76 | 0.78  | 0.84  | 0.89 | 0.79 | 0.90 | 0.81 | 0.80 | 0.94 | 0.81 | 0.86 | 0.97 |      |
| Bmim     | 0.26 | 0.55 | 0.61 | 0.63    | 0.68 | 0.66    | 0.63     | 0.59     | 0.64  | 0.77  | 0.86 | 0.79    | 0.80  | 0.80  | 0.80 | 0.92 | 1.00 | 0.84 | 0.77   | 0.88 | 0.92  | 1.02  | 1.11 | 0.96 | 1.07 | 0.93 | 0.93 | 1.11 | 0.87 | 0.91 | 1.07 |      |
| Hpmim    | 0.26 | 0.51 | 0.56 | 0.59    | 0.64 | 0.62    | 0.59     | 0.56     | 0.60  | 0.71  | 0.79 | 0.73    | 0.74  | 0.74  | 0.74 | 0.84 | 0.89 | 0.78 | 0.74   | 0.81 | 0.84  | 0.91  | 0.97 | 0.85 | 0.96 | 0.86 | 0.85 | 1.01 | 0.83 | 0.88 | 1.01 |      |
| Oemim    | 0.26 | 0.50 | 0.55 | 0.58    | 0.62 | 0.61    | 0.58     | 0.56     | 0.59  | 0.69  | 0.77 | 0.72    | 0.72  | 0.72  | 0.72 | 0.96 | 0.86 | 0.77 | 0.73   | 0.79 | 0.82  | 0.88  | 0.94 | 0.83 | 0.94 | 0.84 | 0.83 | 0.98 | 0.82 | 0.87 | 1.00 |      |
| Mmim     | 0.26 | 0.65 | 0.73 | 0.75    | 0.78 | 0.78    | 0.72     | 0.65     | 0.74  | 0.93  | 1.04 | 0.92    | 0.95  | 0.95  | 0.95 | 0.80 | 1.29 | 0.97 | 0.84   | 1.06 | 1.13  | 1.33  | 1.43 | 1.22 | 1.35 | 1.11 | 1.12 | 1.37 | 0.95 | 0.98 | 1.19 |      |
| BFy      | 0.27 | 0.56 | 0.63 | 0.64    | 0.70 | 0.68    | 0.64     | 0.59     | 0.65  | 0.79  | 0.90 | 0.80    | 0.81  | 0.81  | 0.81 | 0.94 | 1.05 | 0.85 | 0.78   | 0.90 | 0.94  | 1.07  | 1.14 | 0.98 | 1.13 | 0.94 | 0.94 | 1.18 | 0.89 | 0.92 | 1.12 |      |
| Bznmim   | 0.28 | 0.60 | 0.67 | 0.69    | 0.75 | 0.72    | 0.67     | 0.62     | 0.69  | 0.85  | 0.96 | 0.85    | 0.86  | 0.86  | 0.86 | 1.02 | 1.14 | 0.90 | 0.81   | 0.96 | 1.01  | 1.15  | 1.22 | 1.04 | 1.23 | 0.99 | 0.98 | 1.29 | 0.92 | 0.94 | 1.20 |      |
| OHEmim   | 0.43 | 0.89 | 1.00 | 0.96    | 1.06 | 1.00    | 0.91     | 0.80     | 0.92  | 1.17  | 1.32 | 1.09    | 1.15  | 1.15  | 1.15 | 1.42 | 1.47 | 1.12 | 0.95   | 1.23 | 1.33  | 1.52  | 1.67 | 1.38 | 1.43 | 1.22 | 1.16 | 1.38 | 0.92 | 0.98 | 1.10 |      |
| MeOEtPyr | 0.57 | 1.02 | 1.14 | 1.06    | 1.26 | 1.09    | 0.99     | 0.87     | 1.00  | 1.28  | 1.52 | 1.15    | 1.20  | 1.20  | 1.50 | 1.50 | 1.50 | 1.16 | 1.00   | 1.29 | 1.38  | 1.56  | 1.72 | 1.32 | 1.41 | 1.21 | 1.02 | 1.31 | 0.79 | 0.90 | 0.96 |      |
| b-N      | 1.96 | 2.23 | 2.45 | 1.84    | 2.72 | 1.91    | 1.68     | 1.42     | 1.70  | 2.20  | 2.78 | 1.67    | 1.74  | 1.74  | 2.35 | 1.78 | 1.57 | 1.57 | 1.30   | 1.82 | 1.98  | 1.87  | 2.53 | 1.53 | 1.34 | 1.42 | 0.87 | 1.04 | 0.49 | 0.75 | 0.56 |      |

Table S2 Activity coefficients of p-coumaryl alcohol lignin model in ionic liquids calculated by COSMO-RS at 90 °C

|          | F     | Ac   | Fm   | Cl   | C6H5CO2 | C2H6PO4 | C4H10SO4 | E2FO4 | C8H18FO4 | MeSO3 | tol-SO3 | NO3  | CF3CO2 | CF3CO3 | Den  | EtSO4 | MeSO4 | C4H9SO5 | C8H17SO4 | HSO4 | SCN  | Br   | CCN3 | BF4  | CF3SO3 | BC4N4 | PF6  | PB6  | T2N  | FeCl4 |
|----------|-------|------|------|------|---------|---------|----------|-------|----------|-------|---------|------|--------|--------|------|-------|-------|---------|----------|------|------|------|------|------|--------|-------|------|------|------|-------|
| bbbbN    | 0.001 | 0.04 | 0.06 | 0.08 | 0.10    | 0.10    | 0.10     | 0.11  | 0.11     | 0.16  | 0.26    | 0.31 | 0.33   | 0.33   | 0.39 | 0.39  | 0.39  | 0.40    | 0.44     | 0.45 | 0.49 | 0.51 | 0.66 | 0.73 | 0.75   | 0.88  | 1.15 | 1.33 | 1.34 | 1.36  |
| bbbP     | 0.001 | 0.04 | 0.06 | 0.08 | 0.10    | 0.11    | 0.11     | 0.12  | 0.12     | 0.17  | 0.27    | 0.32 | 0.34   | 0.34   | 0.40 | 0.40  | 0.41  | 0.42    | 0.46     | 0.47 | 0.50 | 0.53 | 0.68 | 0.74 | 0.76   | 0.89  | 1.15 | 1.34 | 1.35 | 1.37  |
| bbboP    | 0.002 | 0.04 | 0.06 | 0.09 | 0.11    | 0.12    | 0.12     | 0.12  | 0.13     | 0.18  | 0.29    | 0.34 | 0.36   | 0.36   | 0.42 | 0.43  | 0.43  | 0.44    | 0.49     | 0.48 | 0.53 | 0.52 | 0.72 | 0.78 | 0.75   | 0.95  | 1.23 | 1.45 | 1.46 | 1.49  |
| beecP    | 0.002 | 0.05 | 0.06 | 0.09 | 0.11    | 0.12    | 0.12     | 0.12  | 0.12     | 0.18  | 0.28    | 0.35 | 0.35   | 0.35   | 0.44 | 0.41  | 0.43  | 0.42    | 0.43     | 0.53 | 0.56 | 0.62 | 0.72 | 0.79 | 0.86   | 0.93  | 1.16 | 1.23 | 1.22 | 1.24  |
| BmPyrr   | 0.002 | 0.05 | 0.07 | 0.10 | 0.11    | 0.12    | 0.12     | 0.13  | 0.12     | 0.19  | 0.29    | 0.36 | 0.36   | 0.36   | 0.45 | 0.43  | 0.45  | 0.44    | 0.45     | 0.55 | 0.57 | 0.64 | 0.72 | 0.81 | 0.86   | 0.91  | 1.18 | 1.22 | 1.24 | 1.25  |
| MpPyrr   | 0.002 | 0.05 | 0.07 | 0.10 | 0.12    | 0.12    | 0.12     | 0.13  | 0.12     | 0.20  | 0.29    | 0.37 | 0.37   | 0.37   | 0.46 | 0.44  | 0.46  | 0.44    | 0.45     | 0.57 | 0.59 | 0.66 | 0.74 | 0.84 | 0.89   | 0.93  | 1.21 | 1.22 | 1.23 | 1.25  |
| C14trHxP | 0.002 | 0.06 | 0.08 | 0.11 | 0.14    | 0.14    | 0.15     | 0.16  | 0.16     | 0.22  | 0.35    | 0.41 | 0.45   | 0.45   | 0.52 | 0.52  | 0.53  | 0.54    | 0.61     | 0.58 | 0.65 | 0.53 | 0.89 | 0.96 | 0.77   | 1.17  | 1.52 | 1.80 | 1.80 | 1.86  |
| Bmmim    | 0.002 | 0.05 | 0.07 | 0.10 | 0.12    | 0.13    | 0.12     | 0.13  | 0.13     | 0.20  | 0.30    | 0.37 | 0.36   | 0.36   | 0.49 | 0.44  | 0.45  | 0.44    | 0.45     | 0.55 | 0.59 | 0.69 | 0.78 | 0.79 | 0.86   | 1.00  | 1.12 | 1.27 | 1.20 | 1.21  |
| 1e2mPy   | 0.003 | 0.06 | 0.09 | 0.12 | 0.14    | 0.14    | 0.13     | 0.14  | 0.14     | 0.22  | 0.32    | 0.42 | 0.40   | 0.40   | 0.57 | 0.47  | 0.50  | 0.47    | 0.46     | 0.63 | 0.69 | 0.80 | 0.90 | 0.86 | 0.95   | 1.15  | 1.17 | 1.32 | 1.20 | 1.22  |
| 1b4mPy   | 0.004 | 0.06 | 0.09 | 0.12 | 0.14    | 0.14    | 0.14     | 0.15  | 0.14     | 0.22  | 0.32    | 0.39 | 0.39   | 0.39   | 0.52 | 0.46  | 0.48  | 0.46    | 0.47     | 0.57 | 0.62 | 0.75 | 0.82 | 0.80 | 0.88   | 1.04  | 1.11 | 1.27 | 1.20 | 1.20  |
| EtOEmim  | 0.004 | 0.07 | 0.09 | 0.12 | 0.14    | 0.15    | 0.14     | 0.15  | 0.15     | 0.23  | 0.33    | 0.41 | 0.40   | 0.40   | 0.55 | 0.47  | 0.50  | 0.47    | 0.48     | 0.60 | 0.66 | 0.80 | 0.85 | 0.83 | 0.91   | 1.07  | 1.14 | 1.27 | 1.21 | 1.21  |
| 1Hx4mPy  | 0.004 | 0.06 | 0.08 | 0.12 | 0.14    | 0.14    | 0.14     | 0.15  | 0.14     | 0.21  | 0.31    | 0.38 | 0.38   | 0.38   | 0.51 | 0.45  | 0.46  | 0.45    | 0.48     | 0.55 | 0.60 | 0.72 | 0.80 | 0.77 | 0.84   | 1.02  | 1.09 | 1.28 | 1.22 | 1.21  |
| BPy      | 0.01  | 0.08 | 0.11 | 0.15 | 0.16    | 0.17    | 0.16     | 0.17  | 0.16     | 0.26  | 0.36    | 0.46 | 0.43   | 0.43   | 0.60 | 0.51  | 0.54  | 0.51    | 0.51     | 0.66 | 0.71 | 0.90 | 0.91 | 0.88 | 0.94   | 1.12  | 1.16 | 1.27 | 1.21 | 1.19  |
| Pmmim    | 0.01  | 0.08 | 0.11 | 0.15 | 0.16    | 0.17    | 0.16     | 0.17  | 0.16     | 0.26  | 0.36    | 0.47 | 0.44   | 0.44   | 0.60 | 0.52  | 0.55  | 0.51    | 0.50     | 0.68 | 0.72 | 0.89 | 0.90 | 0.91 | 0.97   | 1.11  | 1.19 | 1.25 | 1.21 | 1.20  |
| Hxmim    | 0.01  | 0.08 | 0.10 | 0.14 | 0.16    | 0.16    | 0.16     | 0.17  | 0.16     | 0.24  | 0.35    | 0.43 | 0.42   | 0.42   | 0.55 | 0.49  | 0.51  | 0.49    | 0.50     | 0.61 | 0.66 | 0.81 | 0.84 | 0.82 | 0.87   | 1.03  | 1.12 | 1.23 | 1.21 | 1.19  |
| Bnmim    | 0.01  | 0.08 | 0.11 | 0.15 | 0.16    | 0.17    | 0.16     | 0.17  | 0.16     | 0.26  | 0.36    | 0.45 | 0.43   | 0.43   | 0.58 | 0.51  | 0.53  | 0.50    | 0.51     | 0.65 | 0.69 | 0.86 | 0.87 | 0.87 | 0.93   | 1.07  | 1.16 | 1.23 | 1.21 | 1.19  |
| Hpmim    | 0.01  | 0.08 | 0.10 | 0.14 | 0.16    | 0.16    | 0.16     | 0.17  | 0.17     | 0.24  | 0.35    | 0.42 | 0.42   | 0.42   | 0.54 | 0.49  | 0.51  | 0.49    | 0.51     | 0.60 | 0.65 | 0.79 | 0.82 | 0.82 | 0.86   | 1.02  | 1.11 | 1.23 | 1.23 | 1.20  |
| Ocmim    | 0.01  | 0.08 | 0.10 | 0.14 | 0.16    | 0.16    | 0.16     | 0.17  | 0.17     | 0.24  | 0.35    | 0.42 | 0.42   | 0.42   | 0.54 | 0.49  | 0.50  | 0.49    | 0.51     | 0.59 | 0.64 | 0.77 | 0.82 | 0.81 | 0.84   | 1.01  | 1.11 | 1.24 | 1.24 | 1.21  |
| Emim     | 0.01  | 0.09 | 0.12 | 0.16 | 0.17    | 0.18    | 0.17     | 0.18  | 0.17     | 0.28  | 0.38    | 0.50 | 0.46   | 0.46   | 0.64 | 0.55  | 0.58  | 0.53    | 0.51     | 0.73 | 0.77 | 0.95 | 0.95 | 0.97 | 1.02   | 1.16  | 1.24 | 1.27 | 1.22 | 1.21  |
| Demim    | 0.01  | 0.08 | 0.10 | 0.14 | 0.16    | 0.16    | 0.16     | 0.17  | 0.17     | 0.24  | 0.35    | 0.41 | 0.42   | 0.42   | 0.53 | 0.49  | 0.50  | 0.49    | 0.52     | 0.58 | 0.63 | 0.74 | 0.81 | 0.80 | 0.81   | 1.01  | 1.11 | 1.26 | 1.27 | 1.23  |
| Bzmim    | 0.01  | 0.09 | 0.12 | 0.16 | 0.17    | 0.18    | 0.17     | 0.18  | 0.17     | 0.27  | 0.38    | 0.49 | 0.45   | 0.45   | 0.64 | 0.54  | 0.57  | 0.52    | 0.52     | 0.70 | 0.76 | 0.96 | 0.97 | 0.92 | 0.99   | 1.21  | 1.18 | 1.34 | 1.20 | 1.21  |
| Mmim     | 0.01  | 0.09 | 0.13 | 0.18 | 0.19    | 0.20    | 0.18     | 0.19  | 0.18     | 0.31  | 0.41    | 0.56 | 0.50   | 0.50   | 0.72 | 0.59  | 0.64  | 0.57    | 0.53     | 0.83 | 0.87 | 1.04 | 1.04 | 1.07 | 1.11   | 1.25  | 1.32 | 1.30 | 1.24 | 1.23  |
| OHEmim   | 0.02  | 0.16 | 0.21 | 0.26 | 0.28    | 0.28    | 0.26     | 0.27  | 0.25     | 0.41  | 0.50    | 0.71 | 0.63   | 0.63   | 0.84 | 0.71  | 0.76  | 0.66    | 0.61     | 0.97 | 1.00 | 1.32 | 1.10 | 1.18 | 1.22   | 1.24  | 1.35 | 1.20 | 1.22 | 1.19  |
| MeOEPyrr | 0.03  | 0.22 | 0.28 | 0.34 | 0.37    | 0.35    | 0.32     | 0.34  | 0.31     | 0.48  | 0.57    | 0.78 | 0.72   | 0.72   | 0.92 | 0.76  | 0.82  | 0.72    | 0.68     | 1.02 | 1.08 | 1.52 | 1.13 | 1.15 | 1.21   | 1.22  | 1.22 | 1.09 | 1.16 | 1.05  |
| b-N      | 0.51  | 0.83 | 0.95 | 1.01 | 0.93    | 0.85    | 0.77     | 0.80  | 0.71     | 1.03  | 0.99    | 1.40 | 1.23   | 1.23   | 1.22 | 1.21  | 1.31  | 1.08    | 1.00     | 1.65 | 1.41 | 2.78 | 1.16 | 1.38 | 1.42   | 1.03  | 1.10 | 0.68 | 1.03 | 0.71  |
